# Supplementary material for: Zinc finger nuclease-based double-strand breaks attenuate malaria parasites and reveal rare microhomology-mediated end joining
Source: PubMed Central journal article supplement (PMC4647826; doi:10.1186/s13059-015-0811-1), 2015-11-17

A

CSP

Hoechst

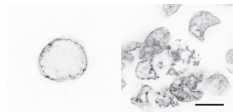

WT

SpZFN SI 2

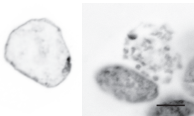

B

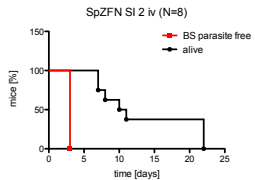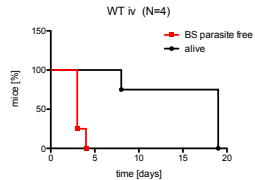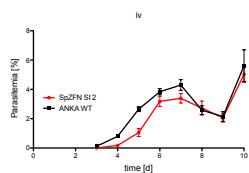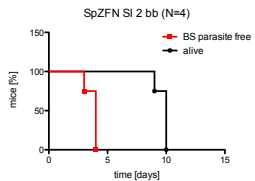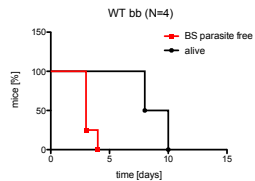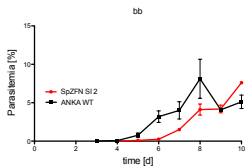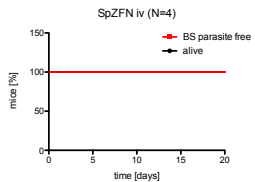

Supplement: 13059_2015_811_MOESM2_ESM.pdf [file 13059_2015_811_MOESM2_ESM.pdf]
