# Supplementary material for: Zinc finger nuclease-based double-strand breaks attenuate malaria parasites and reveal rare microhomology-mediated end joining
Source: PubMed Central journal article supplement (PMC4647826; doi:10.1186/s13059-015-0811-1), 2015-11-17

CSP/Uis4

GFP

Hoechst

Sp2ZFN

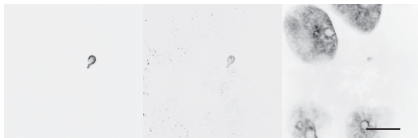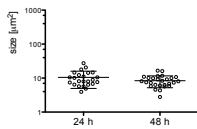

TRAPZFN

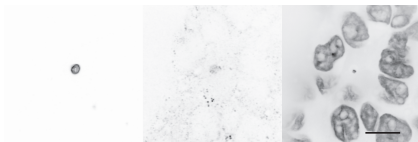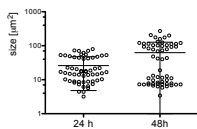

Uis4ZFN

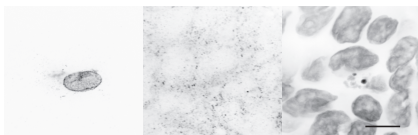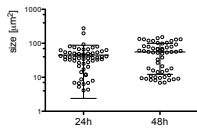

Ls2ZFN

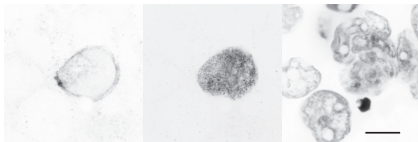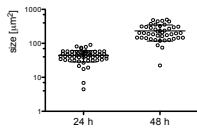

Supplement: 13059_2015_811_MOESM4_ESM.pdf [file 13059_2015_811_MOESM4_ESM.pdf]
