# Supplementary material for: Zinc finger nuclease-based double-strand breaks attenuate malaria parasites and reveal rare microhomology-mediated end joining
Source: PubMed Central journal article supplement (PMC4647826; doi:10.1186/s13059-015-0811-1), 2015-11-17
Supplement: 13059_2015_811_MOESM5_ESM.pdf [file 13059_2015_811_MOESM5_ESM.pdf]

|                |            |                   |            |            |    |            |                   |            |
|----------------|------------|-------------------|------------|------------|----|------------|-------------------|------------|
| SpZFN          | CTATATCATG | <b>GCCGAC</b>     | AAGCAGAAGA | -/         | /- | CGTGCAGCTC | <b>GCCGAC</b>     | CACTACCAGC |
| SpZFN SI 1-4   | CTATATCATG | <b>GCC</b>        |            | -/75 bp/-  |    |            | <b>GAC</b>        | CACTACCAGC |
| SpZFN          | ATGGCCGACA | <b>AGCAGAA</b>    | GAACGGCATC | -/         | /- | GACCACTACC | <b>AGCAGAA</b>    | CACCCCCATC |
| SpZFN SI 8c1   | ATGGCCGACA | <b>AGCA</b>       |            | -/81 bp/-  |    |            | <b>GAA</b>        | CACCCCCATC |
| LsZFN          | AGAAGAACGG | <b>CATC</b>       | AAGGTGAACT | -/         | /- | AGAACACCCC | <b>CATC</b>       | GGCGACGGCC |
| LsZFN SI 3     | AGAAGAACGG | <b>CA</b>         |            | -/81 bp/-  |    |            | <b>TC</b>         | GGCGACGGCC |
| TrapZFN        | TCTGCACCAC | <b>CGGCA</b>      | AGCTGCCCGT | -/         | /- | ACATCGAGGA | <b>CGGCA</b>      | GCGTGCAGCT |
| TrapZFN SI 1   | TCTGCACCAC | <b>CGG</b>        |            | -/369 bp/- |    |            | <b>GCA</b>        | GCGTGCAGCT |
| TrapZFN        | TCAGGGTGTC | <b>CGGCGA</b>     | GGGCGAGGGC | -/         | /- | ACACCCCCAT | <b>CGGCGA</b>     | CGGCCCCGTG |
| TrapZFN SI 2   | TCAGGGTGTC | <b>CGG</b>        |            | -/474 bp/- |    |            | <b>CGA</b>        | CGGCCCCGTG |
| Uis4ZFN        | ATCATGGCAG | <b>ACAAGCAGAA</b> | GAACGGCATC | -/         | /- | GCCGACCACT | <b>ACCAGCAGAA</b> | CACCCCCATC |
| Uis4ZFN SI 1-2 | ATCATGGCAG |                   |            | -/81 bp/-  |    |            | <b>ACCAGCAGAA</b> | CACCCCCATC |
| Uis4ZFN SI 3   | ATCATGGCAG | <b>ACA</b>        |            | -/81 bp/-  |    |            | <b>AGCAGAA</b>    | CACCCCCATC |
