# Supplementary material for: Zinc finger nuclease-based double-strand breaks attenuate malaria parasites and reveal rare microhomology-mediated end joining
Source: Genome Biol. 2015 Nov 17;16:249. doi: 10.1186/s13059-015-0811-1 (PMC4647826; doi:10.1186/s13059-015-0811-1)
Supplement: Additional file 8: Fig. S8. — A list of all primers used in this study. (PDF 396 kb) [file 13059_2015_811_MOESM8_ESM.pdf]

### Primers used in this study

[illegible]
